# Supplementary material
Source: publisher figshare collection journal article supplement (https://acs.figshare.com/ndownloader/files/4327234)
Supplement: Supplementary file 1 [file 4327234]

#======================================================================

# CRYSTAL DATA

#----------------------------------------------------------------------

data_VESTA_phase_1


_pd_phase_name                         'Pmc21 AgNbO3 23.0 oC Neutron'
_cell_length_a                         15.6459(3)
_cell_length_b                         5.55253(11)
_cell_length_c                         5.6091(1)
_cell_angle_alpha                      90
_cell_angle_beta                       90
_cell_angle_gamma                      90
_symmetry_space_group_name_H-M         'P m c 21'
_symmetry_Int_Tables_number            26

loop_
_symmetry_equiv_pos_as_xyz
   'x, y, z'
   '-x, -y, z+1/2'
   'x, -y, z+1/2'
   '-x, y, z'

loop_
   _atom_site_label
   _atom_site_occupancy
   _atom_site_fract_x
   _atom_site_fract_y
   _atom_site_fract_z
   _atom_site_thermal_displace_type
   _atom_site_B_iso_or_equiv
   _atom_site_type_symbol
   Ag1      1.0    0.7504(15)   0.7471(13)   0.266(3)    Biso  0.93(4)  Ag
   Ag2      1.0    0.50000      0.746(5)     0.249(3)    Biso  0.93(4)  Ag
   Ag3      1.0    0            0.743(4)     0.288(3)    Biso  0.93(4)  Ag
   Nb1      1.0    0.6256(7)    0.7571(14)   0.7346(8)   Biso  0.38(2)  Nb
   Nb2      1.0    0.1254(9)    0.24159      0.27981     Biso  0.38(2)  Nb
   O1       1.0    0.7504(15)   0.6996(12)   0.762(5)    Biso  0.74(2)  O
   O2       1.0    0.50000      0.819(2)     0.783(3)    Biso  0.74(2)  O
   O3       1.0    0.6094(7)    0.539(2)     0.480(3)    Biso  0.74(2)  O
   O4       1.0    0.6383(8)    0.035(2)     0.551(3)    Biso  0.74(2)  O
   O5       1.0    0            0.200(2)     0.246(3)    Biso  0.74(2)  O
   O6       1.0    0.1399(9)    0.027(2)    -0.015(3)    Biso  0.74(2)  O
   O7       1.0    0.1132(7)    0.476(2)     0.535(3)    Biso  0.74(2)  O
